1 **Identities of women who have an autoimmune rheumatic disease (ARD) during pregnancy**  
2 **planning, pregnancy and early parenting: A qualitative study**

3 Key words: Identity, motherhood, person-centred care, auto-immune rheumatic disease,  
4 parenting, shared decision-making

5 **Short title:** Identities of women with ARD during preconception decision making.

6 **Authors:** Denitza Williams<sup>1</sup>, Bethan Pell<sup>2</sup>, Aimee Grant<sup>3</sup>, Julia Sanders<sup>4</sup>, Ann Taylor<sup>5</sup>, Adrian  
7 Edwards<sup>1</sup>, Ernest Choy<sup>6</sup> & Rhiannon Phillips<sup>7</sup>

8 <sup>1</sup> Division of Population Medicine, School of Medicine, College of Biomedical and Life  
9 Sciences, Cardiff University.

10 <sup>2</sup> Centre for the Development and Evaluation of Complex Intervention for Public Health  
11 Improvement (DECIPHer), Cardiff University, Cardiff, United Kingdom

12 <sup>3</sup> Centre for Lactation, Infant Feeding and Translational Research, Swansea University

13 <sup>4</sup> School of Healthcare Sciences, Cardiff University

14 <sup>5</sup> Centre for Medical Education, School of Medicine, Cardiff University

15 <sup>6</sup> CREATE Centre, Section of Rheumatology, Division of Infection and Immunity, Cardiff  
16 University

17 <sup>7</sup> Cardiff School of Sport and Health Sciences, Cardiff Metropolitan University

18 <sup>1</sup> Rhiannon Phillips, Cardiff School of Sport and Health Sciences, Cardiff Metropolitan  
19 University

20 \*Corresponding Author: [WilliamsD74@cardiff.ac.uk](mailto:WilliamsD74@cardiff.ac.uk) (DW)

**NOTE: This preprint reports new research that has not been certified by peer review and should not be used to guide clinical practice.**

21

22

### **Abstract**

23 **Objective:** Women of reproductive age who have autoimmune rheumatic diseases (ARDs)  
24 have expressed a need to be better supported with making decisions about pregnancy.  
25 Women with ARDs want their motherhood identities and associated preferences to be  
26 taken into account in decisions about their healthcare. The aim of this study was to explore  
27 the interplay between illness and motherhood identities of women with ARDs during  
28 preconception decision making.

29 **Methods:** Timeline-facilitated qualitative interviews with women diagnosed with an ARD  
30 (18-49 years old). Participants were purposively sampled based on the following three  
31 criteria: thinking about getting pregnant, currently pregnant, or had young children.  
32 Interviews were thematically analysed.

33 **Results:** Twenty-two women were interviewed face-to-face (N=6) or over the telephone  
34 (N=16). Interview length ranged from 20 minutes to 70 minutes, with a mean length of 48  
35 minutes. Three main themes were identified: prioritisation, discrepancy, and trade-off.  
36 Difficulties in balancing multiple identities in healthcare encounters were reported. Women  
37 used 'self-guides' as a reference for priority setting in a dynamic process that shifted as their  
38 level of disease activity altered and as their motherhood identity became more or less of a  
39 focus at a given point in time. Women's illness and motherhood identities did not present in  
40 isolation but were intertwined.

41 **Conclusions:** Findings highlight the need for holistic person-centred care that supports  
42 women with the complex and emotive decisions relating to preconception decision-making.

43 In practice, health professionals need to consider women’s multiple and sometimes  
44 conflicting identities, and include both their condition and family associated goals and  
45 values within healthcare communication.

46

47

48

49

50

51

52

53

54

55

56

57

58

59

60

61

## 62 Introduction

63 Women of reproductive age who have autoimmune rheumatic diseases (ARDs) such as  
64 rheumatoid arthritis (RA) and systemic lupus erythematosus (SLE) have expressed a need to  
65 be better supported with making decisions about pregnancy (1-3). Many women with ARDs  
66 will have positive pregnancy and parenting outcomes, but there are risks involved that need  
67 to be considered, including the potential effects of the disease itself and some disease-  
68 modifying treatments on fertility, pregnancy and breastfeeding (1, 4-6). Women with ARDs  
69 want their motherhood identities and associated preferences to be taken into account in  
70 decisions about their healthcare (2). In this manuscript, we investigate the development and  
71 interplay between illness and motherhood identities of women with ARDs as they navigate  
72 the healthcare system.

73 The diagnosis of chronic illness, such as autoimmune rheumatic disease, can lead to changes  
74 in an individual's sense of 'self' as the previous identity is replaced by an 'illness identity'  
75 once a diagnosis is made and treatment instigated. (7). An illness identity includes  
76 perceptions in relation to physical changes, emotional reactions to the physical changes,  
77 cognitive constructions of the illness and the impact this has on the self-perceived future  
78 (8). When women who have an ARD become mothers, they can be challenged by the  
79 symptoms associated with their illness such as fatigue, pain and impaired psychological well-  
80 being in addition to the usual challenges presented to women without a long-term condition  
81 (1, 9).

82 The social category of being a mother is not neutral and holds a particular meaning and  
83 significance across time and place. There is an ideology of the expectant mother and the  
84 identity she must hold (10). The identity of a 'moral and good' mother is one that is taken

85 on before birth or even pregnancy and embodies the guiding ethic of ‘proper’ care of  
86 children (11). In contrast to the ‘moral and good mother’ is that of the ‘immoral and bad  
87 mother’(10). The identity of an ‘immoral and bad mother’ mother would be that of  
88 someone who fails to live up to the social ideal of a mother that has been imposed by  
89 societal and cultural expectations (10). Developing the identity of a mother involves  
90 internalising perceived ideals of how women ought to function as a mother, whilst  
91 understanding the sometimes contradictory lived reality of mothering (12, 13). Women  
92 who do not reach, or struggle to maintain, this ideal identity have been found to feel  
93 increasing tension over their shortcomings and have reported negative psychological effects  
94 such as feelings of guilt (14, 15).

95 The Self-Discrepancy Theory (16) suggests that the degree of discrepancy between the  
96 actual self (the attributes a person possesses), ought self (who a person feels they should or  
97 must be), and ideal self (who a person hopes or wishes to be) can lead to negative affect,  
98 guilt and shame (17). The values that people attach to their actual, ought, and ideal  
99 identities act as ‘self-guides’ in influencing behaviour and motivation. Analysis of  
100 conversations of a UK on-line parenting forum suggested that women can feel pressure to  
101 be an unrealistic ‘selfless’ and ‘ideal’ mother (18). Women’s perceived shortcomings in  
102 fulfilling their own and others’ expectations of their role as a mother can leave them feeling  
103 dissatisfied and questioning their identity (19, 20). In the context of women with ARDs, Self-  
104 Discrepancy Theory would suggest that if mothers experience a discrepancy between their  
105 actual self (a woman managing a painful and potentially physically disabling condition), their  
106 ideal self (the mother they wish to be) and their ought self (the mother they feel they  
107 should be), this would lead to negative self-evaluations (17, 21).

108 Understanding how women’s illness and motherhood identities influence, and are  
109 influenced by, interactions with healthcare professionals and services is important in  
110 designing patient-centred approaches to healthcare. In this study, we use participatory  
111 qualitative methods to explore the self-identity of women with ARDs as they consider  
112 pregnancy, are pregnant, and/or have young children.

## 113 **Methods**

### 114 ***Design***

115 Timeline-facilitated qualitative interviews with women with ARDs who took part in the STAR  
116 Family Survey (1).

### 117 ***Ethical approval***

118 Ethical approval for the study, including the consent process, was granted by the Cardiff  
119 University School of Medicine Research Ethics Committee on 20/10/16 REF16/56.

### 120 ***Participants and recruitment***

121 Women who had expressed an interest in taking part in an interview were sampled from  
122 the STAR Family Survey (1). The STAR Family Survey was a United Kingdom-based cross-  
123 sectional on-line survey (n=128) focusing on women with ARDs’ experiences of pre-  
124 conception, pregnancy and early parenting.

125 Interview participants were purposively sampled to broadly achieve equal representation of  
126 those who were: thinking about getting pregnant, currently pregnant, or had young  
127 children. The aim was to explore the identity in women who were at different stages of  
128 starting a family, whilst also managing an ARD. Participants were contacted through e-mail  
129 or telephone, based on the contact details provided in the survey. Those who expressed

130 interest in being interviewed were sent a study information pack containing participant  
131 information sheet, consent form and stamped return envelope. Participants were provided  
132 with a £20 shopping voucher as a thank you for taking part.

### 133 ***Inclusion criteria***

134 Women aged 18-49 years, who had been diagnosed with an ARD (i.e. inflammatory arthritis  
135 or auto-immune connective tissue disease for which people would normally be under the  
136 care of a rheumatologist). Women also needed to be planning on becoming pregnant in the  
137 next 5 years, currently pregnant or have a child/children who were under the age of 5 years.  
138 Participants had completed the STAR Family Study survey (1) and consented to interview.

### 139 ***Exclusion criteria***

140 Women who were under 18 or over 50 years of age and those who had a disease not  
141 classified as an ARD (e.g. joint hypermobility, fibromyalgia).

### 142 ***Interview procedure***

143 A flexible narrative approach using visual methods was used to encourage participants to  
144 talk about their 'lived experiences' regarding their experiences of identity, motherhood and  
145 healthcare in their own words, focusing on things that were important to them, rather than  
146 being guided by researcher-generated topics (22). Before the interviews, women were sent  
147 a resource pack containing an example timeline outline, stationary, paper, stickers, and an  
148 information sheet outlining examples of the topics we were interested in covering during  
149 the interview. The timelines provided a visual tool which enabled women to map out their  
150 journey so far. The timelines were used in interviews to provide cues, prompt discussion,  
151 provide an opportunity for self-reflection, and help with building a rapport between

152 participants and the interviewer (23, 24). Preparing a timeline was voluntary and women  
153 were encouraged to use their own formats (e.g. notes, diagrams they had drawn) as an  
154 alternative if they wished to do so. Interviews were conducted face-to-face or over the  
155 telephone. Face-to-face interviews were conducted in the participant's home or at Cardiff  
156 University. Interviews were conducted by Denitza Williams, PhD (DW) and Bethan Pell, BSc  
157 (BP). At the time of the interviews, DW was a post-doctoral researcher and BP was a  
158 research assistant, both identified as female. Neither interviewer identified as having a long-  
159 term condition; DW was a mother to two children, BP did not have any children. The  
160 interviewers had no prior relationships with the participants.

### 161 ***Analysis***

162 All interviews were audio-recorded and transcribed verbatim by a professional transcription  
163 company. DW conducted the analysis. Data were analysed thematically and analysis was  
164 based primarily on social phenomenology (25), focussing on exploring how women made  
165 sense of their identity and motherhood choices. The data were analysed using Braun and  
166 Clarke's Phases of Thematic Analysis (26) which involved familiarisation, generating initial  
167 codes and identifying themes. NVivo10 was used to support the analysis. The protocol did  
168 not include double coding of data. Instead, the qualitative research team (DW, BP, AG, RP)  
169 held regular data analysis meetings to discuss the themes arising from the data, and the  
170 development of the coding framework. Each member of the qualitative research group (RP,  
171 AG, DW, BP) contributed their own perspective, relating to disciplinary backgrounds  
172 including psychology, sociology, social policy and public health. This approach has been  
173 identified as appropriate for enhancing the validity and quality of qualitative research (27).  
174 Analysis was guided by the concept of information power (28) instead of data saturation.



175 **Results**

176 Twenty-two women were interviewed face-to-face (N=6) or over the telephone (N=16).

177 Interview length ranged from 20 minutes to 70 minutes, with a mean length of 48 minutes.

178 Through thematic analysis, three main themes were identified: prioritisation, discrepancy,

179 and trade-off (see Figure 1). Each of the main themes and sub-themes will be discussed

180 below.

181

182 **Figure 1: Thematic map**

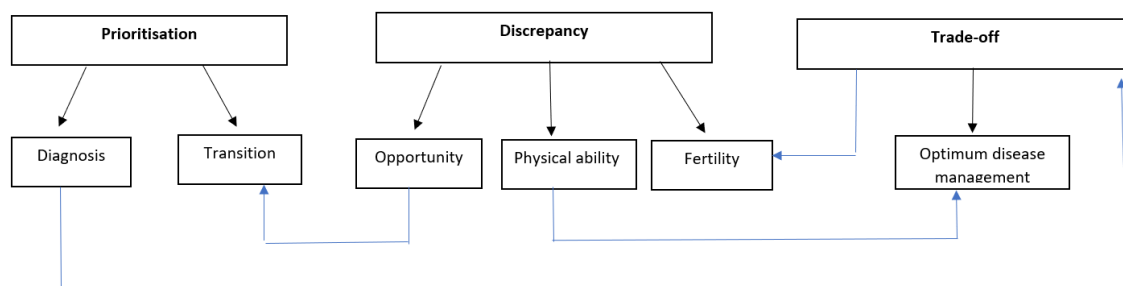

Figure 1: Thematic map

Key: —> Sub-theme  
—> Related theme

183

---

184 **Prioritisation of motherhood versus illness identities**

185 Women spoke about prioritisation of the disease versus their desire for motherhood. Two

186 sub-themes of diagnosis and transition were identified. Women were often ‘juggling

187 meaningful identities’ (29); their identity as a woman, a mother, and a person with a long

188 term condition.

189

190 ***Diagnosis: the disease comes first***

191 Women often reflected on the diagnosis of their ARD and their respective treatment  
192 options, contextualising their experiences in terms of their identity as an individual who was  
193 at crisis point and in desperate need of effective disease management. As disease  
194 management was the priority at this point, when the decision to use disease modifying  
195 drugs that might have an impact on fertility was made, their future motherhood plans were  
196 often not discussed. A woman's own self-identity and the prioritised identity by the clinician  
197 at that point was of a sick patient in need of treatment, and not a woman who might in the  
198 future like to have a child:

199 *Yeah, I think we did talk about kind of because of the chemotherapy treatments it*  
200 *was likely that possibly I wouldn't be able to conceive. So it was kind of not brushed*  
201 *under the carpet but just one of those ok this has happened and we're talking about*  
202 *it but she's not in the place where she's thinking about having children and actually*  
203 *it's better to be healthy (P1)*

204

205 ***Transition: more than the disease***

206 For women who were diagnosed before becoming a mother, shifts in priority were evident  
207 following diagnosis. Women reported that their disease needed to be well-managed to  
208 enable them to become a mother. Some women reported concern about the potential  
209 effects of their ARD when parenting. Concerns about being able to incorporate children into  
210 the 'boundaries of themselves' (30) in terms of the expansion of the self to incorporate  
211 children and the associated demands were raised.

212 *if we're kind of successful in that [becoming a mother], the impact of having a child*  
213 *to bring up and everything that you need to be able to do with that, am I going to be*  
214 *well enough to do that in terms of sitting and you know being able to provide that*  
215 *child with everything it needs in terms of energy and everything else. (P2)*

216 Women discussed how the decision to have children needed to be planned well ahead of  
217 time, because many of the drugs used to treat their ARD have teratogenic effects:

218 *Yeah I guess with like children it's always been ingrained that it has to be planned*  
219 *and stuff like (P2)*

220 Women needed to transition by modifying the drugs that they were taking to manage their  
221 disease before trying for a family. It was felt that this need to plan ahead was forced upon  
222 them due to their ARD and felt that most people do not need to actively transition so far in  
223 advance, or even to consult a health professional at all when planning to become a mother.  
224 The transition signified a motivational and behavioural change between effective  
225 management of disease and actively trying to conceive. The women in our study described  
226 this transition as a difficult time, because they had made the decision that they would like to  
227 have a child but often felt uncertainty about the effect of a pregnancy on their ARD.

228 *I've got my own kind of own concerns about you know being at a point where I'm*  
229 *well enough to become pregnant, being well during the pregnancy, can I stay well*  
230 *enough for 9 months that I don't need extra medication that would impact on the*  
231 *pregnancy (P9)*

232 Self-guides are specific representations of the self or others and can include mental  
233 representations of valued attributes (31). Self-guides can originate from diverse sources

234 such as general social norms, particularly if the guides have relevance in the terms of the life  
235 experiences of the women (31). Here, the values attached to women’s illness identity and  
236 motherhood identity are guiding them in different directions, creating tension as they try to  
237 decide which values are most important at a given time.

### 238 **Self-discrepancy**

239 Some women identified discrepancies between their perceptions of motherhood ideals and  
240 their actual ability to meet these. Sub-themes included discrepancies in fertility, physical  
241 ability and opportunity.

### 242 ***Fertility***

243 Women reflected on the impact of their ARD, their perceived fertility and the chances of a  
244 pregnancy ending in miscarriage. One woman experienced a miscarriage during a disease  
245 flare. She talked about a discrepancy of feelings because she was informed that her poorly  
246 managed disease contributed to the miscarriage, she was also aware that women with ARDs  
247 are more likely to suffer a miscarriage, but also that miscarriage is common among healthy  
248 women. She reported frustration that she had been advised to restart teratogenic  
249 medication and to postpone planning for a baby until her disease was fully under control.

250 *So yeah following the miscarriage I was all for planning to just get pregnant again,*  
251 *but on advice from the rheumatologist and the renal specialist, they you know*  
252 *because I have been so ill that is probably why I miscarried and they have managed*  
253 *to convince me that I’m better off waiting, I’m back on the Micophenolate effectively*  
254 *and I’m in a treatment plan that’s not pregnancy friendly to try and get my lupus*  
255 *under control (P15)*

256 This signals a loss of a valued mothering identity, an important part of the self (32). This  
257 signifies a discrepancy between the self-guides held by the health professional and the  
258 woman in terms of pursuing a course of action that is consistent with her wish to become a  
259 mother (31).

### 260 ***Physical ability***

261 The potential impact of physical disability was identified as a factor in motherhood identity.  
262 One woman reflected on her social identity in terms of the practical social help she received  
263 from a volunteer. The availability of this support helped the mother feel that her children  
264 were not missing out on 'normal' childhood due to her long-term condition. This seemed to  
265 ease some of the guilt she felt in relation to limited mobility:

266 *the only thing I have to say that's helped my kids through it all is in [city] there is the*  
267 *young carer's project they are a charitable organisation (...) they take kids out every*  
268 *other week to do things like to the cinema or the park, or they go bowling. Once a*  
269 *year they go on a residential trip as well so it's kind of to give them a break from*  
270 *caring (P14)*

271 Women reported that their physical disabilities affected their ability to participate in social  
272 group activities relating to motherhood. For example, most women had attended a local  
273 mother and baby group, but found it difficult to participate, mainly because activities were  
274 often floor based. Women reported feeling embarrassed that they were unable to  
275 participate like other mothers, questioning their motherhood identity and highlighting the  
276 discrepancy between their perceived ought and actual self. For example, one woman took  
277 her child to a baby massage group. The activity was floor based and due to the effect of the

278 ARD on her physical abilities she struggled to get back up from the floor and to pick her baby  
279 up:

280 *If I was on the floor I couldn't get up so the first couple of weeks I went I was sat on a*  
281 *chair leaning over [daughter] but then I just it started to make my back ache and*  
282 *everything else and I think for like I wasn't quite bonding with her because it felt like*  
283 *she was so far away so I thought sod it I'll get on the floor with her but that would*  
284 *mean that I would have to crawl to the chair – hand on to something to get myself up*  
285 *and I would literally have to haul myself up off the floor, but yeah I needed somebody*  
286 *to pick <<daughter1>> up off the floor for me and either carry her to the car, or put*  
287 *her in the sling that I had (...) you feel like the odd [one] (P4)*

288 This event led to a sense of shame and isolation. Motherhood can have an effect on women;  
289 their positive and negative qualities can be heightened when reflecting on the mother-child  
290 relationship (29).

291 *the biggest thing for me is the kids they miss out on so much because of this stupid*  
292 *thing with me. I feel rotten because they have to be no holidays forever and all their*  
293 *pals are going to Spain, or Italy or Portugal or States or holidays and my kids are*  
294 *saying maybe we should go to Norway or Finland because it's so cold and it's not that*  
295 *sunny [it wouldn't cause disease flare] ((crying)) (P14)*

296 Women felt that they received discrepancies in recommendation from health professionals,  
297 especially for breastfeeding. They were often encouraged to initiate and maintain  
298 breastfeeding by midwives and health visitors, even though felt it was not the best thing for  
299 themselves or their child at that time due to their condition:

300 *there is such a drive to push you to breastfeed as it is best for the baby and I accepted*  
301 *it, but I also accept that sometimes the best thing in a research report isn't the best*  
302 *thing for the individual and in our case me and my two little ones it certainly wasn't*  
303 *and I think that was why in terms of the health visitor and the midwife and the*  
304 *breastfeeding advocates they're so hell bent on getting a twin mum to breastfeed,*  
305 *because it's that extra pressure again that they focus so much on that they forget the*  
306 *rest of the situation (P8)*

307 Although participants reported that there was a general pressure to continue breastfeeding,  
308 some mothers felt that they were pressured to stop breastfeeding by family members or  
309 health professionals, so that they could restart required certain disease modifying  
310 medications. Many women reported feeling guilty about their inability to breastfeed, or if  
311 they had to stop breastfeeding to re-start medication. Reports of feeling guilty seemed to  
312 stem in part from healthcare professional and peer attitudes towards formula feeding.  
313 Women reported feeling guilty and ashamed of their desire not to breastfeed, inability to  
314 breastfeed or their decision to stop breastfeeding:

315 *"The breastfeeding advocates had been trying to get me to consider alternative*  
316 *medication and stuff which in an ideal world when we have lots of time maybe that*  
317 *would be a nice thing to do, but when things go downhill drastically you know and I*  
318 *was in a lot of pain and I was struggling to hold 2 babies to breastfeed as well*  
319 *because my joints were sore... I marched on and then at 6 weeks I dropped a child... it*  
320 *took me actually dropping the child I think that made me think she was worth*  
321 *listening to" (P8)*

322

323 **Opportunity**

324 One woman reflected on the impact of her physical disability on her actual self as a mother.  
325 Her baby had an accident at home which needed hospital treatment. Due to her lack of  
326 mobility, the woman could not drive to take her child to the hospital independently and had  
327 to rely on a neighbour for help. The woman felt that she did not have the opportunity to  
328 behave as a 'normal' mother who could react fast and take immediate action to help her  
329 child. This intensified her feelings of self-discrepancy and guilt.

330 *"[The] gap underneath the bathroom door was quite big, he [son] must've put his*  
331 *toes underneath it and either pulled the door, or pushed it so he chopped off the end*  
332 *of his big toe it was kind of hanging you can see the bone it was so bad. And I was in*  
333 *my jammies, I was so tired. I asked my neighbour to get my other 2 boys ready for*  
334 *school and get them to school in time and I just took a taxi (...) because I can't drive*  
335 *(...) I was again feeling totally useless because I should have been able to drive him, I*  
336 *should've been able to just get dressed get him in the car and to the hospital and I*  
337 *couldn't put one foot in front of the other I was so tired (...) it was horrible you know*  
338 *that feeling that, that you should be able to do more for your kids" (P14)*

339 A few women talked about the possibility of adopting a child but felt that other people's  
340 perceptions of them due to their ARD limited their opportunities. One woman and her  
341 husband felt that managing her ARD, as well as having a successful pregnancy, would be too  
342 difficult as altering her medication was likely to have a detrimental impact on her health.  
343 She felt that her ability to be a mother was pre-determined by adoption agencies who  
344 made judgements in relation to her long-term condition.



345 *I would have to prove my ability to be a parent so they wouldn't take [stepchildren]*  
346 *at face value, my step children and I would have to go to parenting classes, they'd*  
347 *have to see evidence of me walking, carrying, being able to, they wanted me to have*  
348 *a – you know a pretend baby at home that they can download and things to prove*  
349 *that I was able to meet its needs all throughout the day and night endlessly and it*  
350 *was really full on [husband] and I got furious and I, I was really pissed off at them I*  
351 *remember saying to them you know in this day and age where you can't discriminate*  
352 *against colour, or sexuality you feel you can discriminate against disability you know*  
353 *(P8)*

354 Here, there appears to be a discrepancy between women's actual and ideal self-identity and  
355 agencies' perceptions of what a mother ought to be.

### 356 **Trade-offs between competing values**

357 The complex identity changes women go through when planning to become a mother can  
358 require multiple types of trade-offs, including disease management, mothering aspirations  
359 and mothering ideals. If women's identities have developed in ways in which they are  
360 committed to becoming a parent and being part of a family, the threat their illness poses to  
361 their ability to do this means they have to revisit that commitment, which can lead to  
362 uncertainty and psychological distress. At this stage, women needed to reflect on their goals  
363 and values and what the future holds for them as well as their ability to fulfil their perceived  
364 identity of a 'good' mother (10) .

365 Women reflected on their pre-conception journey and the transitions that needed to be  
366 made in terms of their identity as a person with a disease that needed to be managed and  
367 as a woman who wanted to become a mother. It was often felt that women needed to

368 balance a trade-off between the self as a patient in need of medication to control their ARD  
369 (the actual self) and the self as an individual who is well enough to be a mother to meet  
370 their own expectations and that of society about mothering (the ought self). However, the  
371 ‘ideal’ self is also present here in the sense that women’s own goals and aspirations, which  
372 might be at odds with the ‘ought self’, that is what they think others expect of them.

373 Planning a family involved a balance of clinician advice about the trade-offs associated with  
374 the management of an ARD and maternal desire. They had to balance multiple identities  
375 and expected roles, that of a woman who has a long-term condition and that of a woman  
376 who wants to have a child or to expand her family. Some women felt that their motherhood  
377 identity was being threatened by the management of their ARD and healthcare  
378 communication:

379 *So they then decided they wanted to start me on floudamide I think it’s called which*  
380 *was a disease modifying thing but they told me I couldn’t pregnant on it and that the*  
381 *likelihood of me taking it would affect my fertility. So at that point we said well hang*  
382 *on a minute you know I’m only sort of 25, 26, don’t really want to start taking stuff*  
383 *that going to affect my fertility, maybe we should just put up with stuff the way it is,*  
384 *try and get pregnant, have another baby because we always knew we wanted a*  
385 *second child then go on the drugs at that point if its needs it. (P3)*

386 Others spoke of specific trade-offs in relation to the management of their disease and their  
387 desire to have children. One woman reflected on how she had traded optimum disease  
388 management with the chance of conceiving a baby despite an active disease flare. For her,  
389 the priority at that time was to try to ensure that she had a chance of having a child, and her  
390 clinical team seemed to be supportive by putting in place necessary referrals:

391 *things were flaring back up and they said well look, what we can do is we can do a*  
392 *referral to the fertility clinic, they can take a look and see if there's anything*  
393 *specifically wrong that's stopping it you know you may be eligible for IVF or you know*  
394 *with a discussion with them it might be that they're able to take your eggs and freeze*  
395 *them so that we can start the medication and do it that way. (P3)*

396 Women with ARDs who had successful pregnancies felt that they were “lucky” because they  
397 identified themselves at a higher risk of complications on their journey to motherhood  
398 compared to women who do not have a long-term condition. They spoke of trade-offs in  
399 relation to miscarriage risk and the chance of a successful pregnancy:

400 *I am very very grateful for my two children because there's a lot of people who really*  
401 *suffer and suffer many miscarriages and stuff whereas I have only suffered one*  
402 *miscarriage in my life, a lot of people have suffered a lot worse and haven't been able*  
403 *to have children or have had their fertility robbed because of the medications they've*  
404 *been on and stuff. (P3)*

## 405 **Discussion**

406 In this study, we set out to investigate the development and interplay of women's self-  
407 identity as a person with an ARD and as a mother as they navigated the healthcare system  
408 during preconception planning, pregnancy, and early parenting. Prioritisation of illness  
409 versus motherhood identities, self-discrepancy, and trade-offs between competing values  
410 were identified as major themes in the discussion surrounding women's experiences. The  
411 difficulties in balancing multiple identities in healthcare encounters was evident, both for  
412 the women and for the healthcare professionals. Women seemed to use 'self-guides' (31) as

413 a reference for priority setting in a dynamic process that shifted as their level of disease  
414 activity altered and as their motherhood identity became more or less of a focus at a given  
415 point in time. Women often felt that they needed to balance their ‘actual’ self (individual  
416 with a long-term condition) with their perceptions of the ‘ought’ self (individual well enough  
417 to meet their own as well as society’s expectations of being a mother) as well as perceptions  
418 of the ‘ideal self’ (women’s own goals and aspirations). Self-guides became at odds with  
419 each other when the action that was needed to manage disease well conflicted with the  
420 action required to become a mother or to be a ‘good mother’ as perceived by the individual.  
421 Motherhood identities were also sometimes in conflict with medical recommendations in  
422 relation to achieving optimum disease management. When these discrepancies in identity  
423 and associated self-guides came into conflict (16), women reported feelings of anxiety,  
424 shame, guilt, and frustration. Our findings highlighted the need to consider women’s  
425 multiple and sometimes conflicting identities, with their associated goals and values, in  
426 providing patient-centred healthcare.

427 It has been argued that a mother’s pregnancy and long-term condition must be viewed as  
428 separate but co-existing entities (33). This suggests that women view their identities  
429 separately, with the identity as a mother working separately to the identity as someone who  
430 has a long-term illness. Women’s illness and motherhood identities did not present in  
431 isolation in our study, but rather were intertwined, highlighting the need for holistic patient-  
432 centred care that supports women with the complex and emotive decisions that they need  
433 to make.

434 Previous research has found that the accommodation and recognition of identity shifts in  
435 healthcare communication are imperative for supportive patient decision-making (34). A

436 patient-centred communication style can facilitate such discussions in consultations, placing  
437 ‘what matters most to the patient’ first. Person-centred care encompasses ‘Shared decision-  
438 making’ a process where health professionals provide understandable information, discuss  
439 the pros and cons associated with different treatment options, and fully involve patients in  
440 treatment decisions, considering their personal circumstances and preferences (35, 36). This  
441 enables patients to make more informed decisions that align with their preferences and  
442 thus fit better with their identity, become more active and empowered in their own  
443 healthcare, to have better relationships with their health care professionals, and to feel  
444 more satisfied with the choices that they make (37). There is strong policy support for the  
445 routine use of shared decision-making (SDM) in clinical practice (38, 39). The National  
446 Institute for Health and Care Excellence recently published guidance for the incorporation of  
447 SDM within healthcare (40). Adopting SDM in healthcare teams would enable both illness  
448 and motherhood identities and associated goals and values to be considered by women and  
449 their healthcare teams so that women’s preferences and priorities can be better  
450 incorporated in healthcare decisions.

#### 451 **Strengths and Limitations**

452 This study explored women’s perceived illness and motherhood identities using in-depth  
453 participant centred interviews. This enabled us to understand the way in which women  
454 perceived their motherhood and illness identities and the way this influenced motivation  
455 and behaviour in relation to the management of disease and becoming (or being) a mother.  
456 The women who took part in our interviews were more highly educated and more likely to  
457 be employed than the overall STAR Family survey participants, which is indicative of a  
458 sampling bias that should be taken into consideration when generalising from the findings.

459 Furthermore, this study was conducted before the global COVID-19 pandemic, which saw  
460 significant shifts in the delivery of healthcare, with modifications to services including  
461 remote consultations for non-urgent healthcare appointments, and significant changes in  
462 the provision of maternity services (41). Further research is needed to explore how these  
463 changes might have impacted on healthcare communication.

#### 464 **Conclusion**

465 This study explored self-identity during pre-conception, pregnancy and early parenting in  
466 women with an autoimmune rheumatic disease related to healthcare communication and  
467 decision-making. Women's illness and motherhood aspirations were key parts of the  
468 formation of their self-identity. Women were balancing and shifting through intertwined  
469 illness and mothering identities, which sometimes came into direct conflict with each other.  
470 It is imperative that both illness and motherhood identities are acknowledged and explored  
471 during healthcare encounters to facilitate preference-sensitive healthcare decisions. A  
472 person-centred approach to healthcare communication would facilitate this by encouraging  
473 dialogue between healthcare professionals and women about preferences associated with  
474 treatment decision-making that incorporate both their illness and mothering identities.  
475 Additional research will be required to develop and test the feasibility and acceptability of a  
476 person-centred intervention to be used in healthcare encounters.

#### 477 **Declaration of Competing Interest**

478 No conflicts of interest have been declared.

479

480

481 **Acknowledgments**

482 The authors wish to thank all of the women that took part in this research. We would like to  
483 thank our patient involvement representatives for their continued support with this work.

484 We would also like to thank the Wellcome Trust for funding this research.

485

486

487

488

489

490

491

492

493

494

495

496

497

498

499

## 500 References

- 501 1. Phillips R, Pell B, Grant A, Bowen D, Sanders J, Taylor A, et al. Identifying the unmet  
502 information and support needs of women with autoimmune rheumatic diseases during pregnancy  
503 planning, pregnancy and early parenting: mixed-methods study (Under review). 2018.
- 504 2. Phillips R, Williams D, Bowen D, Morris D, Grant A, Pell B, et al. Reaching a consensus on  
505 research priorities for supporting women with autoimmune rheumatic diseases during pre-  
506 conception, pregnancy and early parenting: A Nominal Group Technique exercise with lay and  
507 professional stakeholders. *Wellcome Open Res.* 2018;3:75.
- 508 3. Ackerman IN, Jordan JE, Van Doornum S, Ricardo M, Briggs AM. Understanding the  
509 information needs of women with rheumatoid arthritis concerning pregnancy, post-natal care and  
510 early parenting: A mixed-methods study. *BMC Musculoskelet Disord.* 2015;16:194.
- 511 4. Williams D, Webber J, Pell B, Grant A, Sanders J, Choy E, et al. “Nobody knows, or seems to  
512 know how rheumatology and breastfeeding works”: Women's experiences of breastfeeding whilst  
513 managing a long-term limiting condition – A qualitative visual methods study. *Midwifery.*  
514 2019;78:91-6.
- 515 5. Ostensen M, Brucato A, Carp H, Chambers C, Dolhain RJEM, Doria A, et al. Pregnancy and  
516 reproduction in autoimmune rheumatic diseases. *Rheumatology.* 2011;50(4):657-64.
- 517 6. Ostensen M, Cetin I. Autoimmune connective tissue diseases. *Best Practice & Research*  
518 *Clinical Obstetrics & Gynaecology.* 2015;29(5):658-70.
- 519 7. Goffman E. *Stigma: Notes on the Management of Spoiled Identity.* . New York: Simon &  
520 Schusler; 1963.
- 521 8. Charmaz K, Rosenfeld D. Chronic Illness. In: Cockerham W, editor. *New Blackwell Companion*  
522 *to Medical Sociology.* London: Blackwe;;; 2010. p. 312-33.
- 523 9. Kristiansen TM, Primdahl J, Antoft R, *al. e.* Everyday life with rheumatoid arthritis and  
524 implications for patient education and clinical practice: a focus group study. *Musculoskeletal Care.*  
525 2012;10:29-38.



- 526 10. Murphey S. Reclaiming a moral identity: stillbirth, stigma and 'moral mothers'. *Midwifery*.  
527 2011;28:476-80.
- 528 11. May V. On being a 'good' mother: the moral presentation of self in written live stories.  
529 *Sociology*. 2008;42(470-486).
- 530 12. Choi P, Henshaw C, Baker S, Tree J. Supermum, superwife, supereverything: Performing  
531 femininity in the  
532 transition to motherhood. . *Journal of Reproductive and Infant Psychology*. 2005;23:167–80.
- 533 13. Laney E, Hall E, Anderson T, Willingham M. Becoming a Mother: The Influence of  
534 Motherhood on Women’s Identity Development Identity: An International Journal of Theory and  
535 Research. 2015(15):126–45,.
- 536 14. Arendell T. Conceiving and investigating motherhood: The decade’s scholarship. *Journal of*  
537 *Marriage and the Family*. 2000:1192-207.
- 538 15. Phanco ML. Internal tension and faith: A qualitative exploration of mothers working in  
539 Christian academia  
540 (Unpublished doctoral dissertation). Rosemead School of Psychology, Biola University, La Mirada,  
541 CA. 2003.
- 542 16. Higgins ET. Self-discrepancy: a theory relating self and affect. *Psychological Review*.  
543 1987;94(319-340).
- 544 17. Morley S. The Self in Pain. *Review in Pain*. 2010;4(1):24-7.
- 545 18. Pederson S. The good, the bad and the 'good enough' mother on the UK parenting forum  
546 Mumsnet. *Women's Studies International Forum*. 2016;59:32-8.
- 547 19. Feldhusen C, Bjork M, Forsblad-d'Elia H, al. e. Perception, consequences, communication  
548 and strategies for handling fatigue in persons with rheumatoid arthritis of workling age- a focus  
549 group study. *Clin Rheumatol*. 2013;32(557-566).

- 550 20. Hatcher SL. The psychological experience of nursing mothers upon learning of a toxic  
551 substance in their breast milk. . *Psychiatry*. 1982;45(172-181).
- 552 21. Goffman E. *Stigma: Notes on the Management of Spoiled Identity*. London: Penguin; 1963 :  
553 12.
- 554 22. Gabb J, Fink J. Telling Moments and Everyday Experience: Multiple Methods Research on  
555 Couple Relationships and Personal Lives. *Sociology*. 2015;49(5):970-87.
- 556 23. Goldenberg T, Finneran C, Andes KL, Stephenson R. Using participant-empowered visual  
557 relationship timelines in a qualitative study of sexual behaviour. *Global Public Health*. 2016;11(5-  
558 6):699-718.
- 559 24. Pell B, Williams D, Phillips R, Sanders J, Edwards A, Choy E, et al. Using Visual Timelines in  
560 Telephone Interviews: Reflections and Lessons Learned From the Star Family Study. *International*  
561 *Journal of Qualitative Methods*. 2020;19:1609406920913675.
- 562 25. Fereday J, Muir-Cochrane E. Demonstrating rigor using thematic analysis: A hybrid approach  
563 of inductive and deductive coding and theme development. *International journal of qualitative*  
564 *methods*. 2006;5(1):80-92.
- 565 26. Braun V, Clarke V. Using thematic analysis in psychology. *Qualitative Research in*  
566 *Psychology*2006.
- 567 27. Barbour R. Checklists for improving rigour in qualitative research: a case of the tail wagging  
568 dog? *BMJ*. 2001;322(7294):1115-7.
- 569 28. Malterud K, Siersma V, Guassora A. Sample size in qualitative interview studies:guided by  
570 information power. *Qual Health Res*. 2016;26:1753-60.
- 571 29. Feddersen H, Kristiansen T, Andersen P, Horslev-Petersen K, Primdahl J. Juggling identities of  
572 rheumatoid arthritis, motherhood and paid work- a grounded theory study. *Disability and*  
573 *Rehabilitation*. 2018;<https://doi.org/10.1080/09638288.2018.1433723>.

- 574 30. Laney E, Hall E, Anderson T, Willingham M. Becoming a mother: the influence of  
575 motherhood on women's identity development. *International journal of theory and research*  
576 2015;15(2):126-45.
- 577 31. Moretti M, Higgins ET. Internal representations of others in self-regulation: a new look at a  
578 classic issue. *Social Cognition*. 1999;17(2):186-208.
- 579 32. Wonch Hill P, Cacciatore J, Shreffler KM, Pritchard KM. The loss of self: The effect of  
580 miscarriage, stillbirth, and child death on maternal self-esteem. *Death Studies*. 2017;41(4):226-35.
- 581 33. Thomas H. Pregnancy, illness and the concept of career. *Sociol Health Illn*. 2003;25(5):383-  
582 407.
- 583 34. Palmer-Wackerly AL, Dailey PM, Krok-Schoen JL, Rhodes ND, Krieger JL. Patient Perceptions  
584 of Illness Identity in Cancer Clinical Trial Decision-Making. *Health Communication*. 2018;33(8):1045-  
585 54.
- 586 35. Elwyn G, et al. Shared decision making: a model for clinical practice. . *Journal of general*  
587 *internal medicine*. 2012;27`10`:1361-7.
- 588 36. Joseph-Williams N, Williams D, Wood F, Lloyd A, Brain K, Thomas N, et al. A descriptive  
589 model of shared decision making derived from routine implementation in clinical practice  
590 ('Implement-SDM'): Qualitative study. *Patient Education and Counseling*. 2019;102(10):1774-85.
- 591 37. De Silva D. *Evidence: Helping people share decision making*. . London; 2012.
- 592 38. Barr PJ, Durand M. *Implementing shared decision making: The role of incentives*. *Shared*  
593 *Decision Making in Health Care: Achieving evidence-based patient choice*. 2016.
- 594 39. Joseph-Williams N, Lloyd A, Edwards A, Stobbart L, Tomson D, Macphail S, et al.  
595 *Implementing shared decision making in the NHS: lessons from the MAGIC programme*. *Bmj*.  
596 2017;357.
- 597 40. NICE. *Shared decision making 2021* [Available from:  
598 <https://www.nice.org.uk/guidance/ng197>.
- 599 41. Foundation. *PI. Babies in Lockdown*. 2020 August 2020.

600

601
